# Supplementary material for: Alkyl chain grafted poly(l-lysine): self-assembly and biomedical application as carriers
Source: Royal Society of Chemistry journal article supplement (doi:10.1039/c0sm01034k), 2011-01-01
Supplement: c0sm01034k.pdf [file c0sm01034k.pdf]

## Supporting Information

# Alkyl Chain Grafted Poly(L-lysine): Self-Assembly and Biomedical Application as Carriers

Yun-Chiao Huang, Marannu Arham, Jeng-Shiung Jan\*

Department of Chemical Engineering National Cheng Kung University No 1,  
University Rd., Tainan, Taiwan 70101 (Taiwan)

### Experimental Section

**Material.** FITC-dextran was purchased from Aldrich.

#### **Encapsulation of FITC-dextran in the PLH vesicles.**

PLH (6 mg) dissolved in 3 ml methanol was placed in a glass vial (20 mL) and a thin polypeptide film was deposited on the wall of the glass vial by removing methanol under vacuum. The FITC-dextran was suspended in PBS (pH 7.4) at a concentration of 1 mg/mL. 5 mL of this solution was then added to the glass vial, resulting in vesicles forming off the surface and simultaneously encapsulating FITC-dextran in them. The resulting solution was dialyzed against PBS to remove free FITC-dextran. Fluorescence measurement of FITC-dextran encapsulated PLH vesicles in aqueous solutions was taken on a Carl Zeiss LSM510 laser scanning confocal microscope.

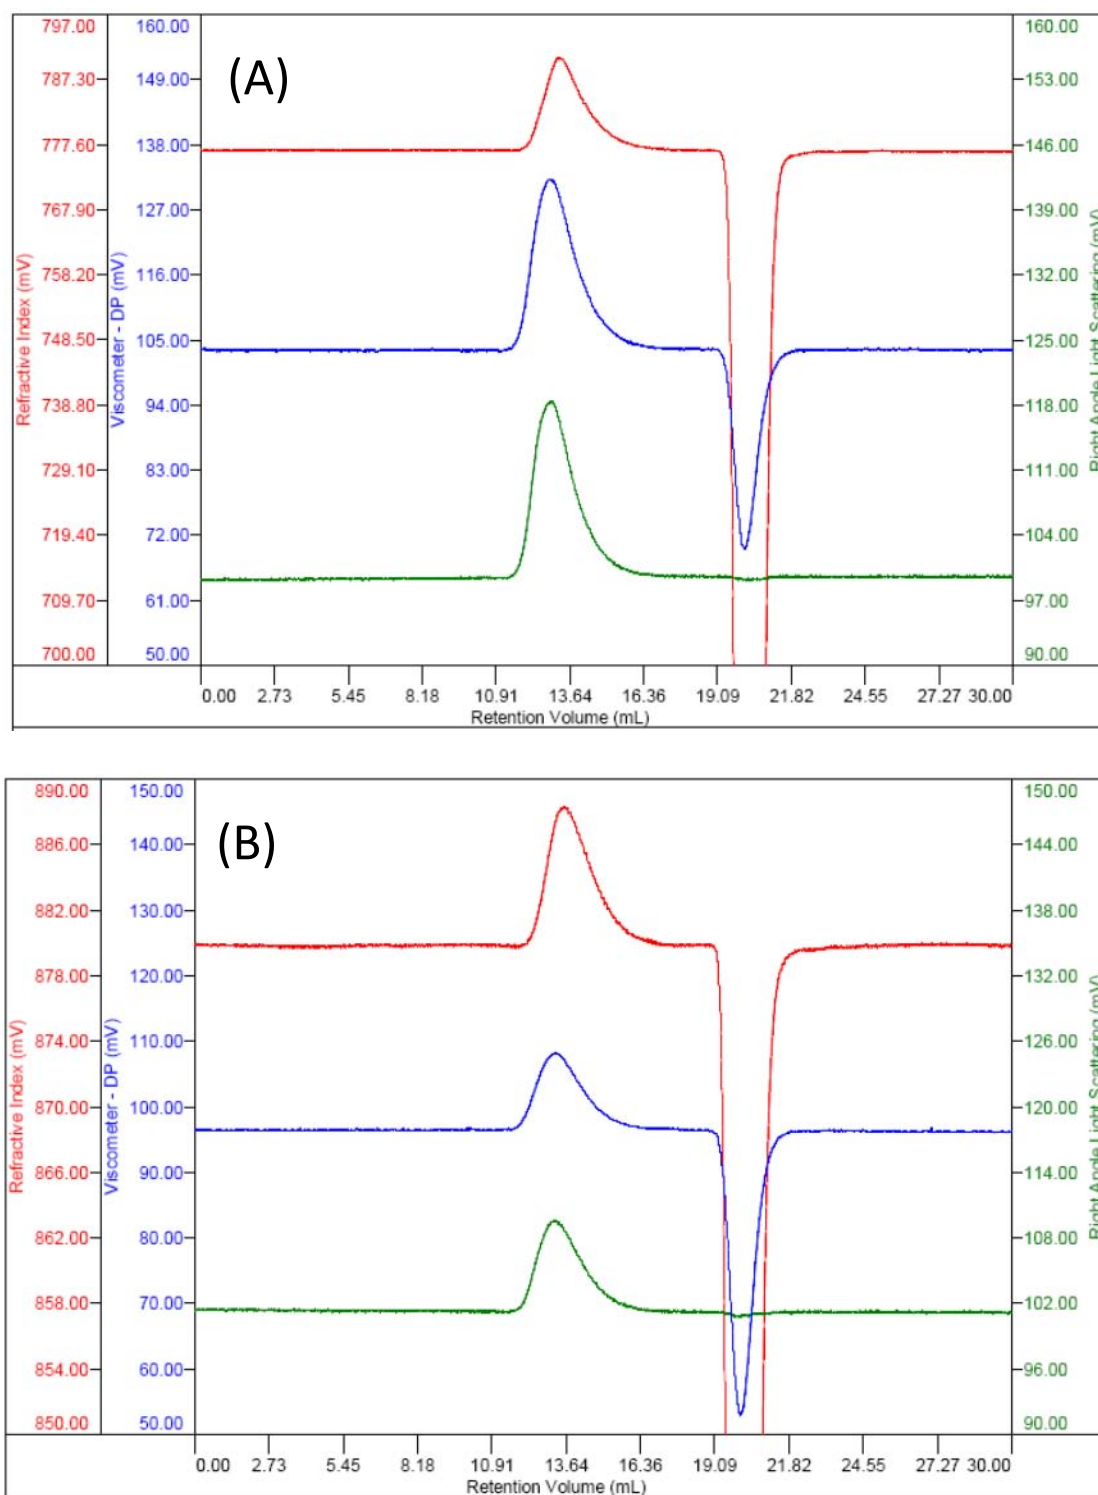

**Fig. S1** The GPC chromatograms of (A) Z-Lys<sub>260</sub> (M<sub>n</sub>=68900, M<sub>w</sub>/M<sub>n</sub>= 1.25) and (B) Z-Lys<sub>190</sub> (M<sub>n</sub>=51900, M<sub>w</sub>/M<sub>n</sub>= 1.19) from three detectors (RI, right angle light scattering, and viscometer).

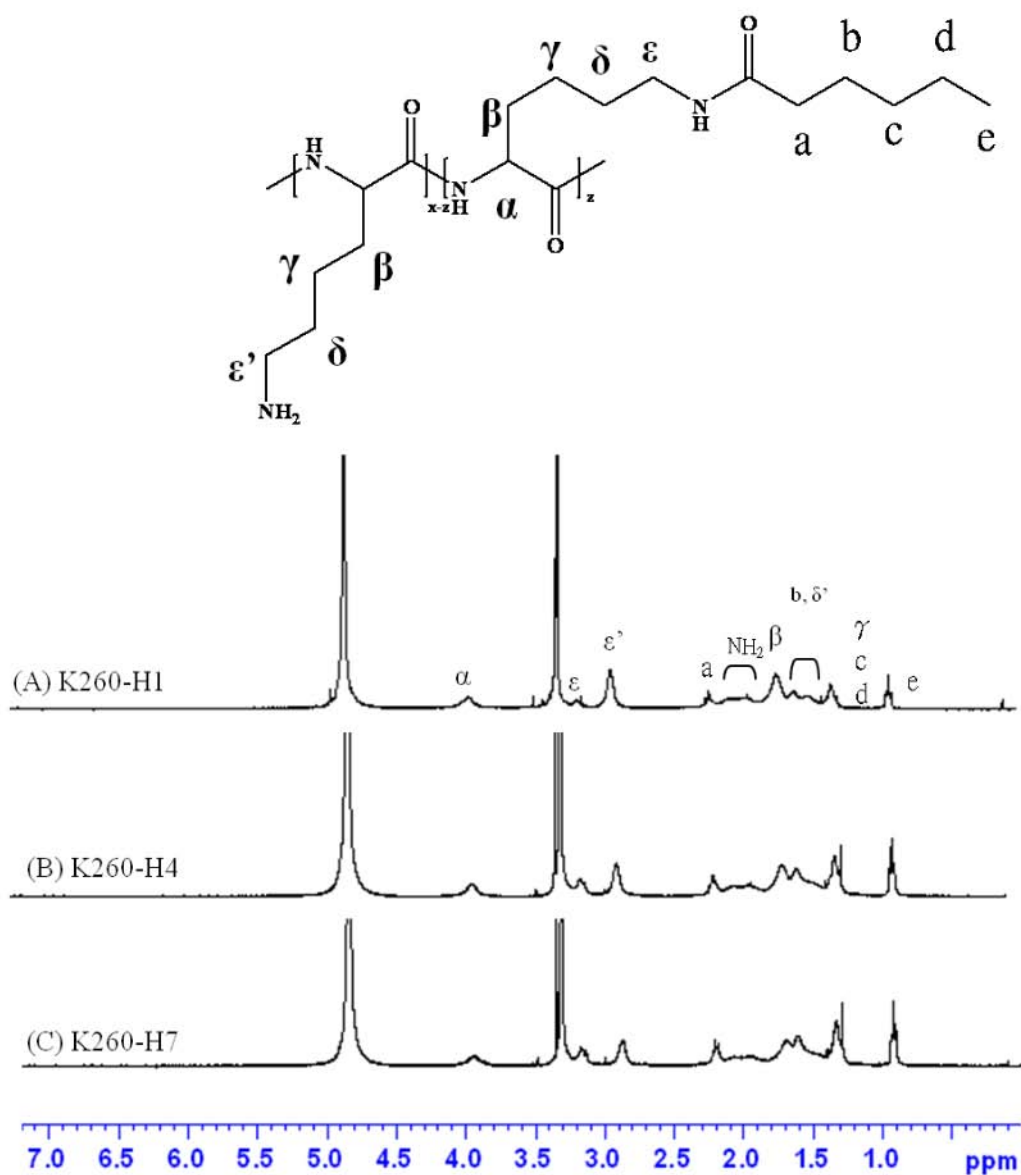

**Fig. S2** <sup>1</sup>H NMR spectra of (A) K260-H1, (B) K260-H4 and (C) K260-H7 copolypeptides in CD<sub>3</sub>OD.

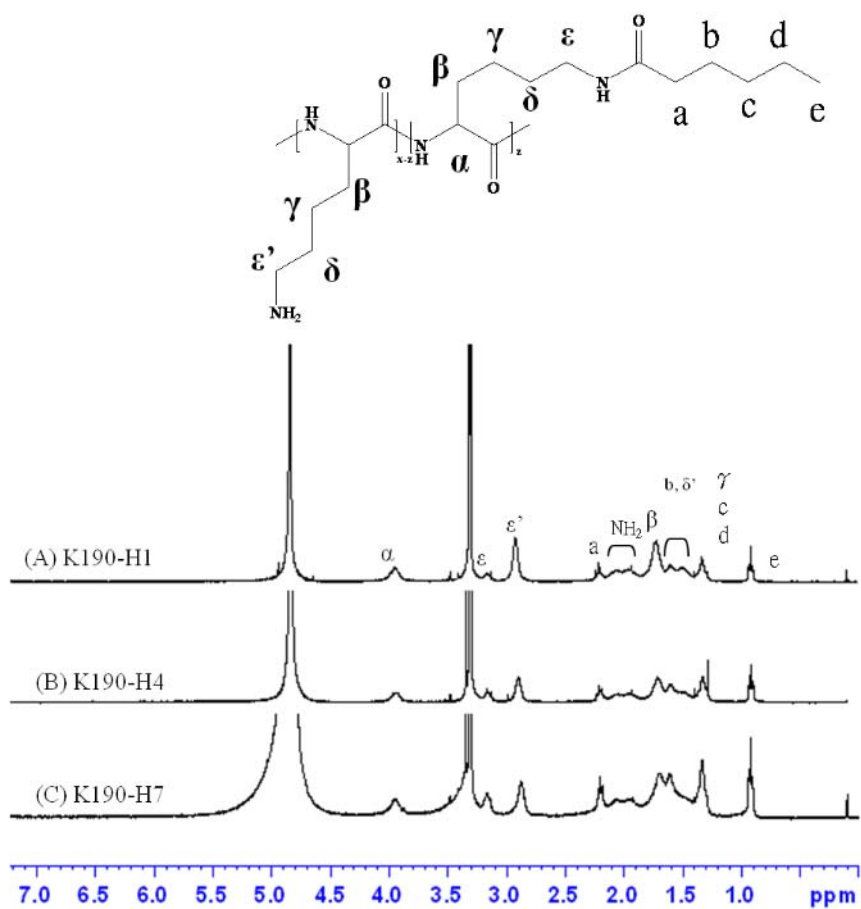

**Fig. S3** <sup>1</sup>H NMR spectra of (A) K190-H1, (B) K190-H4 and (C) K190-H7 copolypeptides in CD<sub>3</sub>OD.

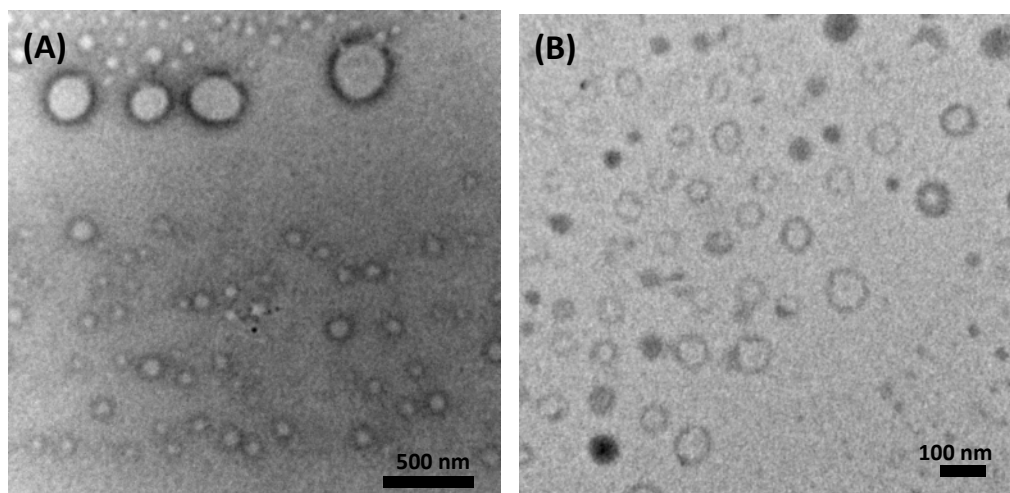

**Fig. S4** TEM images of vesicles formed by (A) K190-H7 and (B) K260-H4 copolypeptides at pH 7.4 in PBS using RuO<sub>4</sub> positive staining.

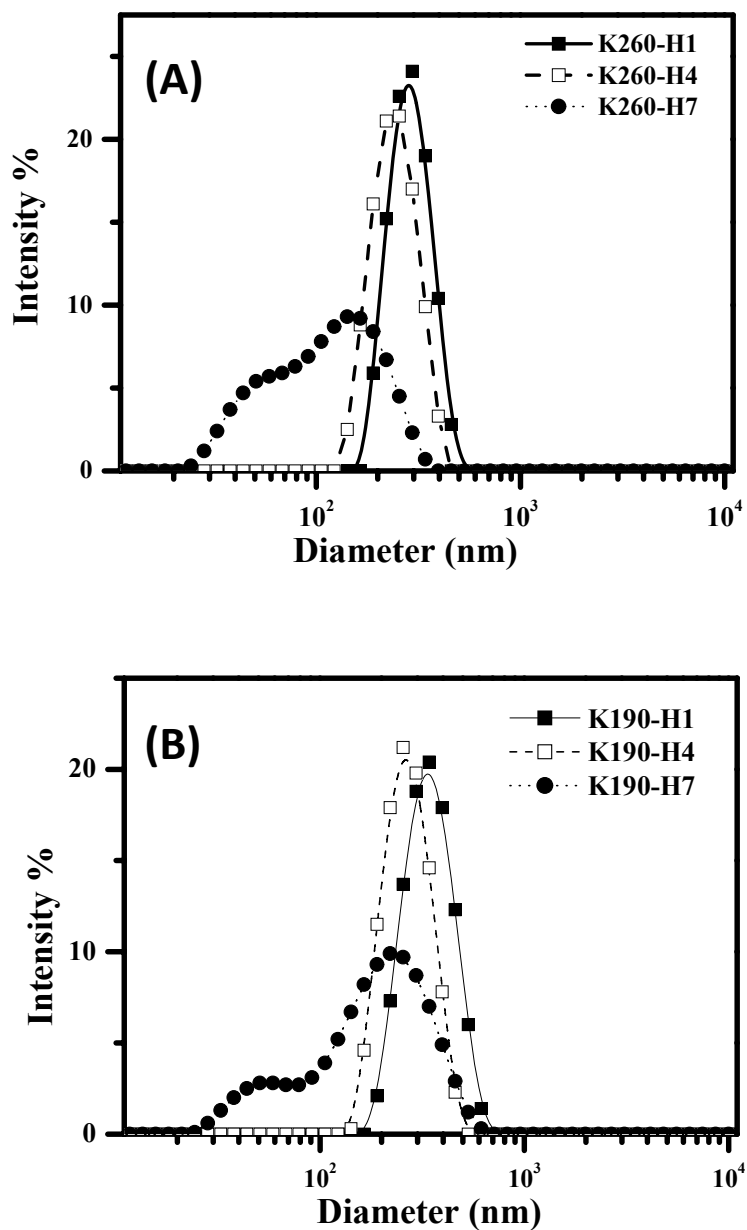

**Fig. S5** The hydrodynamic diameter distributions,  $f(D_h)$ , for PLH vesicles in PBS ( $I=0.01$  N and pH 7.4).

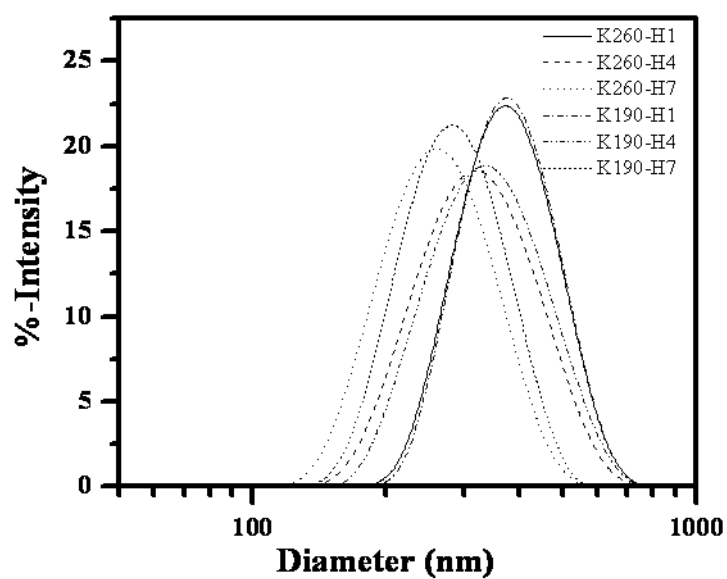

**Fig. S6** The hydrodynamic diameter distributions,  $f(D_h)$ , for PLH vesicles in PBS ( $I=0.01$  N and pH 4.68).

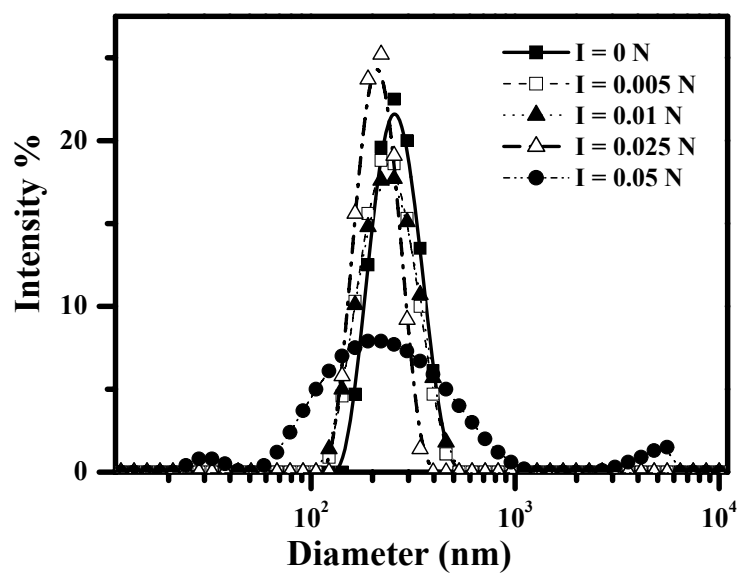

**Fig. S7** The hydrodynamic diameter distributions,  $f(D_h)$ , for K260-H4 copolyptide (2 mg/ml) at different ionic strengths.



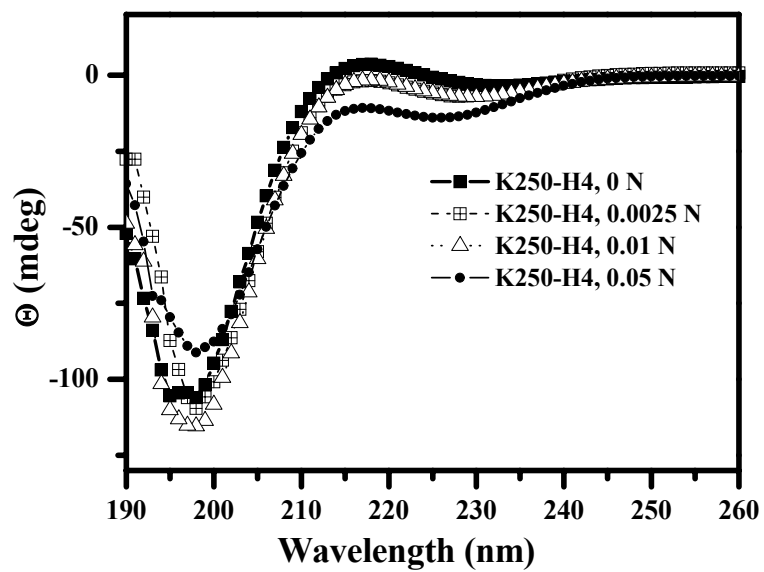

**Fig. S8** CD spectra obtained for K260-H4 copolypeptide (2 mg/ml) at different ionic strengths.

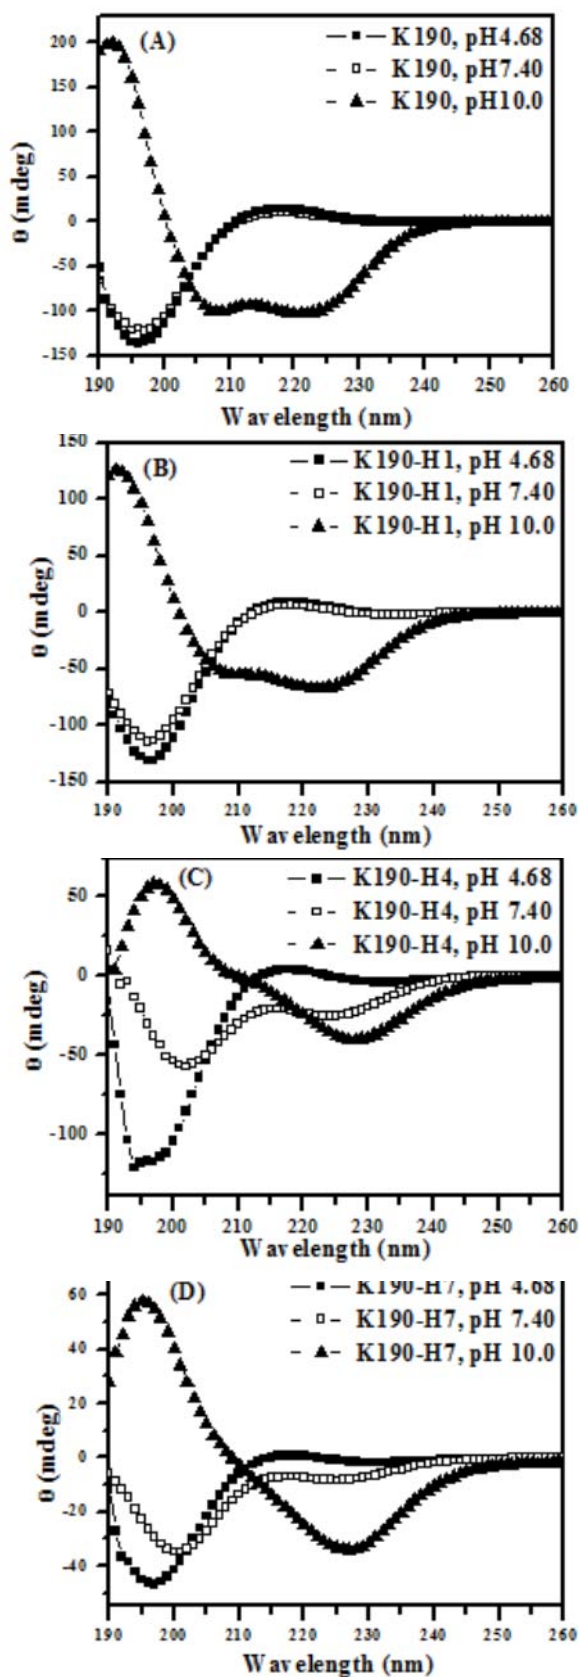

**Fig. S9** CD spectra obtained for (A) K190, (B) K190-H1, (C) K190-H4, and (D) K190-H7 copolypeptides at pH 4.68 (■), 7.4 (□), and 10.0 (▲), respectively.

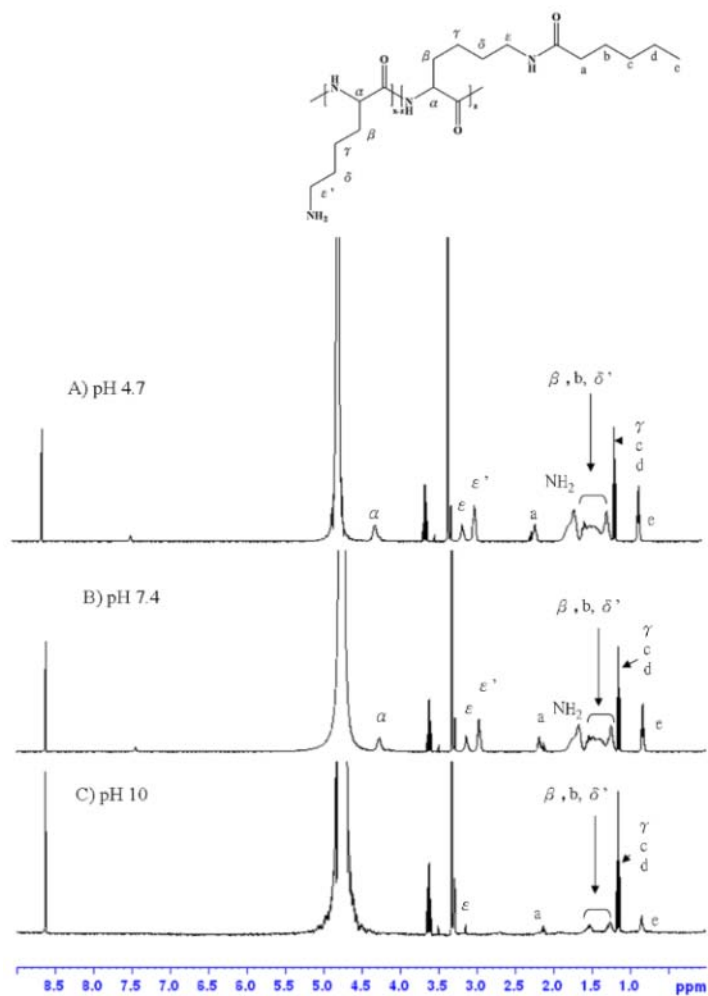

**Fig. S10** <sup>1</sup>H NMR spectra of K190-H7 copolypeptide in D<sub>2</sub>O at (A) pH 4.7 (B) pH 7.40 (C) pH 10.0.

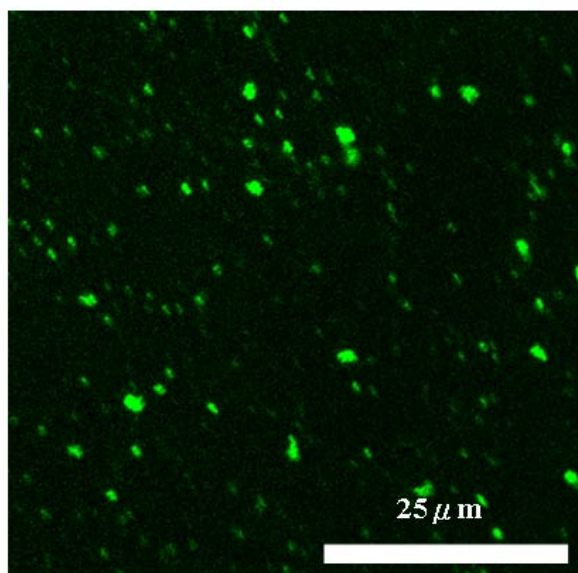

**Fig. S11** Confocal image of FITC-dextran encapsulated K190-H4 vesicles. The sample was not sonicated or did not pass through the filters.

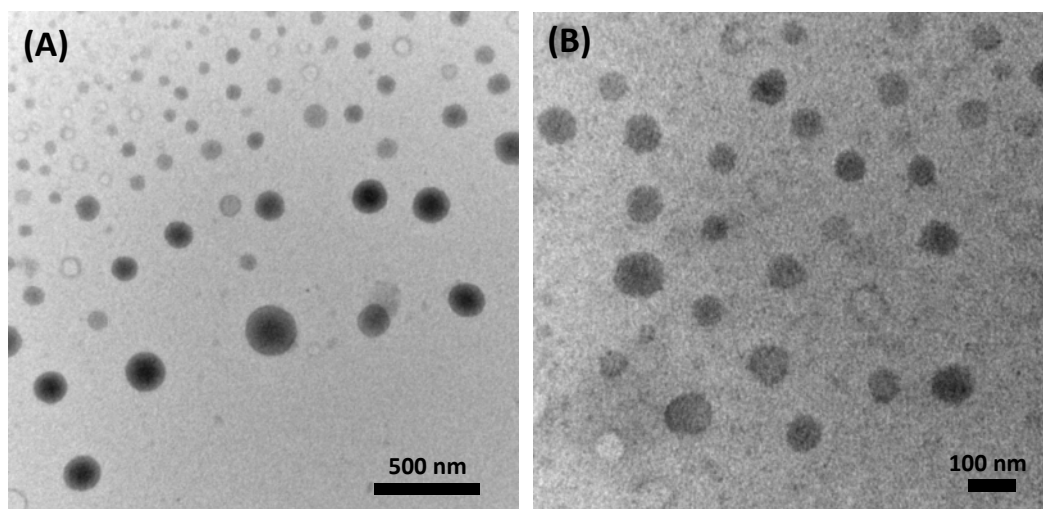

**Fig. S12** TEM images of (A) Mb-loaded K190-H4 particles and (B) Mb-loaded K190-H7 particles.

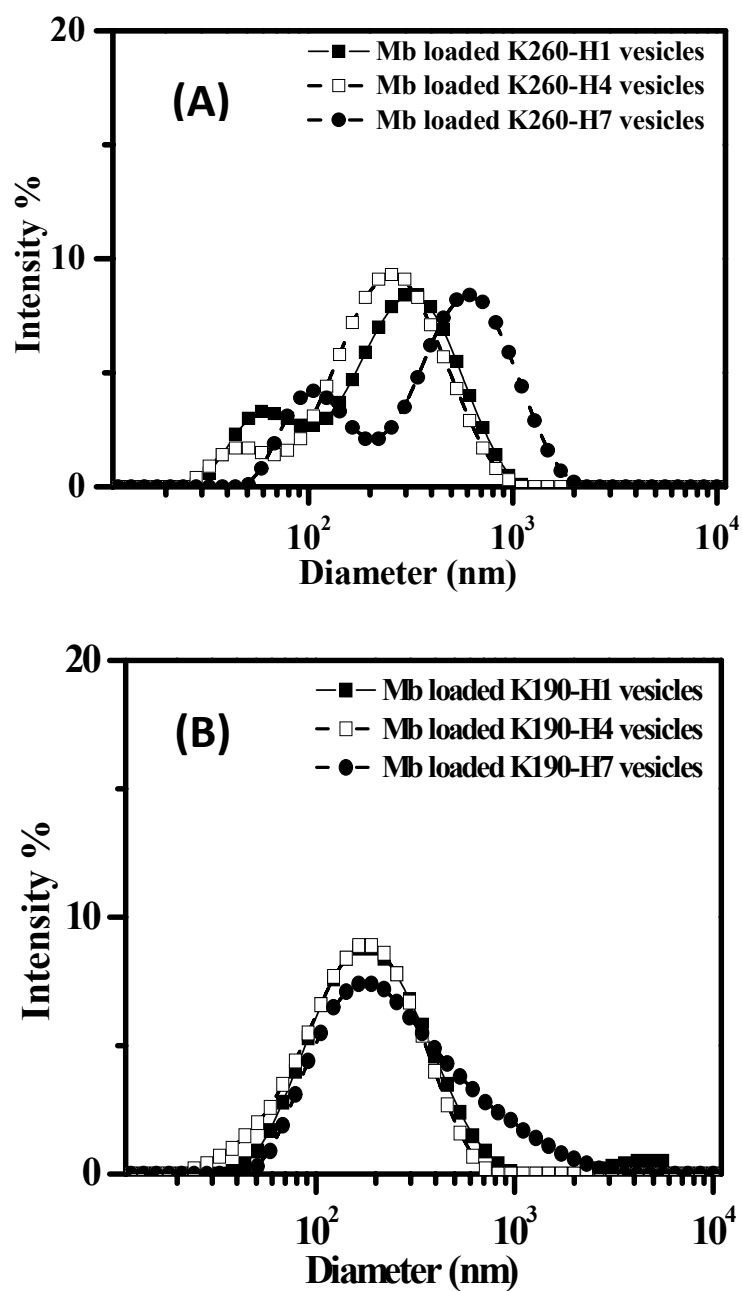

**Fig. S13** The hydrodynamic diameter distributions,  $f(D_h)$ , for Mb-loaded PLH particles.

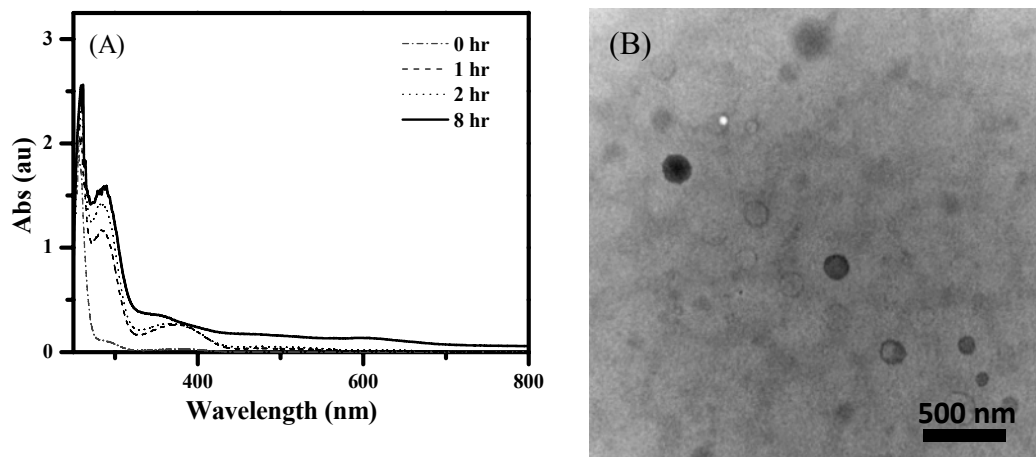

**Fig. S14** (A) UV-vis spectra of K190-H4 vesicles crosslinked by genipin as a function of time at pH 5 and (B) TEM image of crosslinked K190-H4 vesicles. The sample was prepared at pH 5 in DI water.

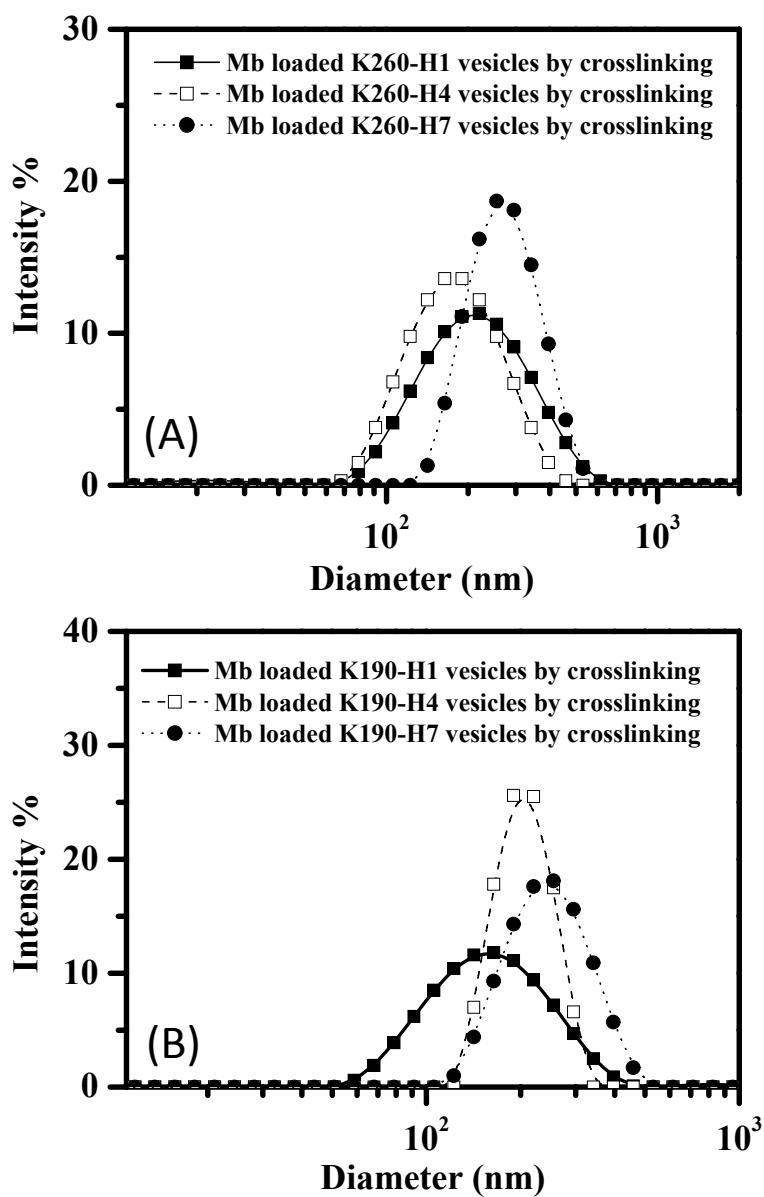

**Fig. S15** The hydrodynamic diameter distributions,  $f(D_h)$ , for Mb-loaded PLH particles.
